# Supplementary material for: Cross-sectional analyses of metabolites across biological samples mediating dietary acid load and chronic kidney disease
Source: PubMed Central journal article supplement (PMC10907771; doi:10.1016/j.isci.2024.109132), 2024-02-05
Supplement: mmc1.pdf [file mmc1.pdf]

**Supplemental information**

**Cross-sectional analyses of metabolites  
across biological samples mediating dietary acid  
load and chronic kidney disease**

**Ilias Attaye, Beverley Beynon-Cobb, Panayiotis Louca, Ana Nogal, Alessia Visconti, Francesca Tettamanzi, Kari Wong, Gregory Michellotti, Tim D. Spector, Mario Falchi, Jordana T. Bell, and Cristina Menni**

**Supplementary table S1: AGReMA checklist, related to figure 1**

| Section/Topic                   | Item Number | Item Description                                                                                                                                                                                                                                                                                                                                                                            | Reported on page No |
|---------------------------------|-------------|---------------------------------------------------------------------------------------------------------------------------------------------------------------------------------------------------------------------------------------------------------------------------------------------------------------------------------------------------------------------------------------------|---------------------|
| <b>Title and abstract</b>       |             |                                                                                                                                                                                                                                                                                                                                                                                             |                     |
| Title                           | 1           | Identify that the study uses mediation analysis                                                                                                                                                                                                                                                                                                                                             | 1                   |
| Abstract                        | 2           | Provide a structured summary of the objectives, methods, results, and conclusions specific to mediation analyses                                                                                                                                                                                                                                                                            | 2                   |
| <b>Introduction</b>             |             |                                                                                                                                                                                                                                                                                                                                                                                             |                     |
| Background and rationale        | 3           | Describe the study background and theoretical rationale for investigating the mechanisms of interest. Include supporting evidence or theoretical rationale for why the intervention or exposure might have a causal relationship with the proposed mediators. Include supporting evidence or theoretical rationale for why the mediators might have a causal relationship with the outcomes | 3                   |
| Objectives                      | 4           | State the objectives of the study specific to the mechanisms of interest. The objectives should specify whether the study aims to test or estimate the mechanistic effects                                                                                                                                                                                                                  | 3                   |
| <b>Methods</b>                  |             |                                                                                                                                                                                                                                                                                                                                                                                             |                     |
| Study registration              | 5           | If applicable, provide references to any protocols or study registrations specific to the mediation analysis, and highlight any deviations from the planned protocol                                                                                                                                                                                                                        | NA                  |
| Study design and source of data | 6           | Specify the design of the original study that was used in mediation analyses and where the details can be accessed, supported by a reference. If applicable, describe study design features that are relevant to mediation analyses                                                                                                                                                         | 4                   |
| Participants                    | 7           | Describe the target population, eligibility criteria specific to mediation analyses, study locations, and study dates (start of participant enrolment and end of follow-up)                                                                                                                                                                                                                 | 4                   |
| Sample Size                     | 8           | State whether a sample size calculation was conducted for mediation analyses. If so, explain how it was calculated                                                                                                                                                                                                                                                                          | 6                   |
| Effects of interest             | 9           | Specify the effects of interest                                                                                                                                                                                                                                                                                                                                                             | 6                   |
| Assumed causal model            | 10          | Include a graphic representation of the assumed causal model including the exposure, mediator, outcome, and possible confounders                                                                                                                                                                                                                                                            | 4                   |
| Causal assumptions              | 11          | Specify assumptions about the causal model                                                                                                                                                                                                                                                                                                                                                  | 6                   |
| Measurement                     | 12          | Clearly describe the interventions or exposures, mediators, outcomes, confounders, and moderators that were used in the analyses. Specify how and when they were measured, the measurement properties, and whether blinded assessment was used                                                                                                                                              | 5-6                 |
| Measurement levels              | 13          | If relevant, describe the levels at which the exposure, mediator, and outcome were measured                                                                                                                                                                                                                                                                                                 | NA                  |

|                                                 |    |                                                                                                                                                                                                                                                                                                                                                                                                                   |       |
|-------------------------------------------------|----|-------------------------------------------------------------------------------------------------------------------------------------------------------------------------------------------------------------------------------------------------------------------------------------------------------------------------------------------------------------------------------------------------------------------|-------|
| Statistical methods                             | 14 | Describe the statistical methods used to estimate the causal relationships of interest. This description should specify analytical strategies used to reduce confounding, model building procedures, justification for the inclusion or exclusion of possible interaction terms, modelling assumptions, and methods used to handle missing data. Provide a reference to the statistical software and package used | 5-6   |
| Sensitivity analyses                            | 15 | Describe any sensitivity analyses that were used to explore causal or statistical assumptions and the influence of missing data                                                                                                                                                                                                                                                                                   | NA    |
| Ethical approval                                | 16 | Name the institutional research board or ethics committee that approved the study. Provide a description of participant informed consent or ethics committee waiver of informed consent                                                                                                                                                                                                                           | 7     |
| <b>Results</b>                                  |    |                                                                                                                                                                                                                                                                                                                                                                                                                   |       |
| Participants                                    | 17 | Describe baseline characteristics of participants included in mediation analyses. Report the total sample size and number of participants lost during follow-up or with missing data                                                                                                                                                                                                                              | 7     |
| Outcomes and estimates                          | 18 | Report point estimates and uncertainty estimates for the exposure-mediator and mediator-outcome relationships. If inference concerning the causal relationship of interest is considered feasible given the causal assumptions, report the point estimate and uncertainty estimate                                                                                                                                | 8     |
| Sensitivity parameters                          | 19 | Report the results from any sensitivity analyses used to assess robustness of the causal or statistical assumptions, and the influence of missing data                                                                                                                                                                                                                                                            | NA    |
| <b>Discussion</b>                               |    |                                                                                                                                                                                                                                                                                                                                                                                                                   |       |
| Limitations                                     | 20 | Discuss the limitations of the study including potential sources of bias                                                                                                                                                                                                                                                                                                                                          | 12    |
| Interpretation                                  | 21 | Interpret the estimated effects considering the study's magnitude and uncertainty, plausibility of the causal assumptions, limitations, generalizability of the findings, and results from relevant studies                                                                                                                                                                                                       | 10-12 |
| Implications                                    | 22 | Discuss the implications of the overall results for clinical practice, policy, and science                                                                                                                                                                                                                                                                                                                        | 10-12 |
| <b>Other information</b>                        |    |                                                                                                                                                                                                                                                                                                                                                                                                                   |       |
| Funding and role of sponsor                     | 23 | List all sources of funding or sponsorship for the mediation analysis and the role of the funders/sponsors in the conduct of the study, writing of the manuscript, and decision to submit for publication.                                                                                                                                                                                                        | 13    |
| Conflicts of interest and financial disclosures | 24 | State any conflicts of interest and financial disclosures for all authors                                                                                                                                                                                                                                                                                                                                         | 12    |
| Data and code                                   | 25 | Authors are encouraged to provide a statement for sharing data and code for the mediation analysis                                                                                                                                                                                                                                                                                                                | 14    |

*From:* Lee H, Cashin AG, Lamb SE, Hopewell S, Vansteelandt S, VanderWeele TJ, et al. A Guideline for Reporting Mediation Analyses of Randomized Trials and Observational Studies. The AGReMA Statement. JAMA. 2021;326(11):1045–1056. doi:10.1001/jama.2021.14075

AGReMA is designed for articles that report mediation analyses of randomized trials or observational studies.  
For more information, visit: [agrema-statement.org](https://agrema-statement.org)

**Table S2: results of regression models used for mediation analyses with serum metabolites Related to figure 2.**

**Model 0=CKD~ acid intake+age+sex+bmi**

**Model 1=metabolite~ acid intake + age+ sex+ bmi**

**Model 2 CKD~ acid intake+metabolite+age+sex+bmi**

**Model 3 metabolite~ acid intake+age+sex+bmi**

**Model 4 CKD~ acid intake + age+ sex+ bmi**

**Model 5 metabolite~ acid intake+CKD+age+sex+bmi**

**VAF-1= Variance Accounted For using metabolite as mediator; VAF-2= Variance Accounted For using CKD as mediator;**

**ACME-1=Average Causal Mediation Effects using metabolite as mediator; AMCE-2= Average Causal Mediation Effects using CKD as mediator**

|             | Model 0_1-methyl-5-imidazoleacetate            |      |          | Model 1_1-methyl-5-imidazoleacetate            |      |          | Model 2_1-methyl-5-imidazoleacetate            |      |         |          |
|-------------|------------------------------------------------|------|----------|------------------------------------------------|------|----------|------------------------------------------------|------|---------|----------|
|             | estimate                                       | SE   | p-value  | estimate                                       | SE   | p-value  | estimate                                       | SE   | p-value |          |
| acid intake | 0.32                                           | 0.15 | 0.03     | acid intake                                    | 0.22 | 0.06     | acid intake                                    | 0.23 | 0.15    | 0.13     |
|             |                                                |      |          |                                                |      | 4.00E-04 | metabolite                                     | 0.53 | 0.08    | 4.66E-11 |
| ACME-1=     | $\beta=0.022$ ; $p<2E-16$                      |      |          | VAF-1=26.72%                                   |      |          |                                                |      |         |          |
|             | Model 3_1-methyl-5-imidazoleacetate            |      |          | Model 4_1-methyl-5-imidazoleacetate            |      |          | Model 5_1-methyl-5-imidazoleacetate            |      |         |          |
|             | estimate                                       | SE   | p-value  | estimate                                       | SE   | p-value  | estimate                                       | SE   | p-value |          |
| acid intake | 0.22                                           | 0.06 | 4.00E-04 | acid intake                                    | 0.06 | 0.03     | acid intake                                    | 0.19 | 0.06    | 1.73E-03 |
|             |                                                |      |          |                                                |      | 0.03     | CKD                                            | 0.46 | 0.07    | 1.09E-11 |
| ACME-2=     | $\beta=0.030$ ; $p=0.042$                      |      |          | VAF-2=11.15%                                   |      |          |                                                |      |         |          |
|             | Model 0_3,5-dichloro-2,6-dihydroxybenzoic acid |      |          | Model 1_3,5-dichloro-2,6-dihydroxybenzoic acid |      |          | Model 2_3,5-dichloro-2,6-dihydroxybenzoic acid |      |         |          |
|             | estimate                                       | SE   | p-value  | estimate                                       | SE   | p-value  | estimate                                       | SE   | p-value |          |
| acid intake | 0.32                                           | 0.15 | 0.03     | acid intake                                    | 0.28 | 0.06     | acid intake                                    | 0.28 | 0.15    | 0.06     |
|             |                                                |      |          |                                                |      | 4.46E-06 | metabolite                                     | 0.16 | 0.08    | 0.03     |
| ACME-1=     | $\beta=0.009$ ; $p=0.040$                      |      |          | VAF-1=12.28%                                   |      |          |                                                |      |         |          |

| <b>Model 3_3,5-dichloro-2,6-dihydroxybenzoic acid</b> |                           |           |                | <b>Model 4_3,5-dichloro-2,6-dihydroxybenzoic acid</b> |                 |           |                | <b>Model 5_3,5-dichloro-2,6-dihydroxybenzoic acid</b> |                 |           |                |
|-------------------------------------------------------|---------------------------|-----------|----------------|-------------------------------------------------------|-----------------|-----------|----------------|-------------------------------------------------------|-----------------|-----------|----------------|
|                                                       | <b>estimate</b>           | <b>SE</b> | <b>p-value</b> |                                                       | <b>estimate</b> | <b>SE</b> | <b>p-value</b> |                                                       | <b>estimate</b> | <b>SE</b> | <b>p-value</b> |
| acid intake                                           | 0.28                      | 0.06      | 4.46E-06       | acid intake                                           | 0.06            | 0.03      | 0.03           | acid intake                                           | 0.27            | 0.06      | 9.79E-06       |
|                                                       |                           |           |                |                                                       |                 |           |                | CKD                                                   | 0.16            | 0.07      | 0.02           |
| ACME-2=                                               | $\beta=1.03E-02; p=0.054$ |           |                | VAF-2=NA; no significant mediation                    |                 |           |                |                                                       |                 |           |                |
| <b>Model 0_3-methylhistidine</b>                      |                           |           |                | <b>Model 1_3-methylhistidine</b>                      |                 |           |                | <b>Model 2_3-methylhistidine</b>                      |                 |           |                |
|                                                       | <b>estimate</b>           | <b>SE</b> | <b>p-value</b> |                                                       | <b>estimate</b> | <b>SE</b> | <b>p-value</b> |                                                       | <b>estimate</b> | <b>SE</b> | <b>p-value</b> |
| acid intake                                           | 0.32                      | 0.15      | 0.03           | acid intake                                           | 0.23            | 0.06      | 0.00           | acid intake                                           | 0.25            | 0.15      | 0.09           |
|                                                       |                           |           |                |                                                       |                 |           |                | metabolite                                            | 0.39            | 0.08      | 0.00           |
| ACME-1=                                               | $\beta=0.017; p<2E-16$    |           |                | VAF-1=21.89%                                          |                 |           |                |                                                       |                 |           |                |
| <b>Model 3_3-methylhistidine</b>                      |                           |           |                | <b>Model 4_3-methylhistidine</b>                      |                 |           |                | <b>Model 5_3-methylhistidine</b>                      |                 |           |                |
|                                                       | <b>estimate</b>           | <b>SE</b> | <b>p-value</b> |                                                       | <b>estimate</b> | <b>SE</b> | <b>p-value</b> |                                                       | <b>estimate</b> | <b>SE</b> | <b>p-value</b> |
| acid intake                                           | 0.25                      | 0.06      | 5.20E-05       | acid intake                                           | 0.06            | 0.03      | 0.03           | acid intake                                           | 0.24            | 0.06      | 9.99E-05       |
|                                                       |                           |           |                |                                                       |                 |           |                | CKD                                                   | 0.15            | 0.07      | 0.03           |
| ACME-2=                                               | $\beta=0.021; p=0.030$    |           |                | VAF-2=3.47%                                           |                 |           |                |                                                       |                 |           |                |
| <b>Model 0_deoxycarnitine</b>                         |                           |           |                | <b>Model 1_deoxycarnitine</b>                         |                 |           |                | <b>Model 2_deoxycarnitine</b>                         |                 |           |                |
|                                                       | <b>estimate</b>           | <b>SE</b> | <b>p-value</b> |                                                       | <b>estimate</b> | <b>SE</b> | <b>p-value</b> |                                                       | <b>estimate</b> | <b>SE</b> | <b>p-value</b> |
| acid intake                                           | 0.32                      | 0.15      | 0.03           | acid intake                                           | 0.24            | 0.06      | 9.57E-05       | acid intake                                           | 0.15            | 0.15      | 0.32           |
|                                                       |                           |           |                |                                                       |                 |           |                | metabolite                                            | 0.78            | 0.09      | 5.91E-19       |
| ACME-1=                                               | $\beta=0.034; p<2E-16$    |           |                | VAF-1=36.91%                                          |                 |           |                |                                                       |                 |           |                |

| <b>Model 3_deoxycarnitine</b> |                           |           |                | <b>Model 4_deoxycarnitine</b> |                 |           |                | <b>Model 5_deoxycarnitine</b> |                 |           |                |
|-------------------------------|---------------------------|-----------|----------------|-------------------------------|-----------------|-----------|----------------|-------------------------------|-----------------|-----------|----------------|
|                               | <b>estimate</b>           | <b>SE</b> | <b>p-value</b> |                               | <b>estimate</b> | <b>SE</b> | <b>p-value</b> |                               | <b>estimate</b> | <b>SE</b> | <b>p-value</b> |
| acid intake                   | 0.24                      | 0.06      | 9.57E-05       | acid intake                   | 0.06            | 0.03      | 0.03           | acid intake                   | 0.20            | 0.06      | 6.85E-04       |
|                               |                           |           |                |                               |                 |           |                | CKD                           | 0.63            | 0.06      | 2.86E-21       |
| ACME-2=                       | $\beta=0.040$ ; $p=0.024$ |           |                | VAF-2=                        | 13.61%          |           |                |                               |                 |           |                |

| <b>Model 0_N1-methylinosine</b> |                           |           |                | <b>Model 1_N1-methylinosine</b> |                 |           |                | <b>Model 2_N1-methylinosine</b> |                 |           |                |
|---------------------------------|---------------------------|-----------|----------------|---------------------------------|-----------------|-----------|----------------|---------------------------------|-----------------|-----------|----------------|
|                                 | <b>estimate</b>           | <b>SE</b> | <b>p-value</b> |                                 | <b>estimate</b> | <b>SE</b> | <b>p-value</b> |                                 | <b>estimate</b> | <b>SE</b> | <b>p-value</b> |
| acid intake                     | 0.32                      | 0.15      | 0.03           | acid intake                     | 0.19            | 0.06      | 8.83E-04       | acid intake                     | 0.18            | 0.15      | 0.24           |
|                                 |                           |           |                |                                 |                 |           |                | metabolite                      | 0.83            | 0.09      | 2.46E-19       |
| ACME-1=                         | $\beta=0.029$ ; $p=0.002$ |           |                | VAF-1=                          | 33.03%          |           |                |                                 |                 |           |                |

| <b>Model 3_N1-methylinosine</b> |                           |           |                | <b>Model 4_N1-methylinosine</b> |                 |           |                | <b>Model 5_N1-methylinosine</b> |                 |           |                |
|---------------------------------|---------------------------|-----------|----------------|---------------------------------|-----------------|-----------|----------------|---------------------------------|-----------------|-----------|----------------|
|                                 | <b>estimate</b>           | <b>SE</b> | <b>p-value</b> |                                 | <b>estimate</b> | <b>SE</b> | <b>p-value</b> |                                 | <b>estimate</b> | <b>SE</b> | <b>p-value</b> |
| acid intake                     | 0.19                      | 0.06      | 8.83E-04       | acid intake                     | 0.06            | 0.03      | 0.03           | acid intake                     | 0.15            | 0.06      | 0.01           |
|                                 |                           |           |                |                                 |                 |           |                | CKD                             | 0.60            | 0.06      | 3.16E-22       |
| ACME-2=                         | $\beta=0.039$ ; $p=0.026$ |           |                | VAF-2=                          | 15.93%          |           |                |                                 |                 |           |                |

| <b>Model 0_N6,N6,N6-trimethyllysine</b> |                           |           |                | <b>Model 1_N6,N6,N6-trimethyllysine</b> |                 |           |                | <b>Model 2_N6,N6,N6-trimethyllysine</b> |                 |           |                |
|-----------------------------------------|---------------------------|-----------|----------------|-----------------------------------------|-----------------|-----------|----------------|-----------------------------------------|-----------------|-----------|----------------|
|                                         | <b>estimate</b>           | <b>SE</b> | <b>p-value</b> |                                         | <b>estimate</b> | <b>SE</b> | <b>p-value</b> |                                         | <b>estimate</b> | <b>SE</b> | <b>p-value</b> |
| acid intake                             | 0.32                      | 0.15      | 0.03           | acid intake                             | 0.20            | 0.07      | 2.30E-03       | acid intake                             | 0.22            | 0.15      | 0.15           |
|                                         |                           |           |                |                                         |                 |           |                | metabolite                              | 0.58            | 0.08      | 2.75E-14       |
| ACME-1=                                 | $\beta=0.022$ ; $p=0.002$ |           |                | VAF-1=                                  | 26.61%          |           |                |                                         |                 |           |                |

**Model 3\_N6,N6,N6-trimethyllysine**

**Model 4\_N6,N6,N6-trimethyllysine**

**Model 5\_N6,N6,N6-trimethyllysine**

|             | <b>estimate</b>           | <b>SE</b> | <b>p-value</b> |             | <b>estimate</b> | <b>SE</b> | <b>p-value</b> |             | <b>estimate</b> | <b>SE</b> | <b>p-value</b> |
|-------------|---------------------------|-----------|----------------|-------------|-----------------|-----------|----------------|-------------|-----------------|-----------|----------------|
| acid intake | 0.20                      | 0.07      | 2.30E-03       | acid intake | 0.06            | 0.03      | 0.03           | acid intake | 0.17            | 0.06      | 0.01           |
|             |                           |           |                |             |                 |           |                | CKD         | 0.58            | 0.07      | 1.29E-15       |
| ACME-2=     | $\beta=0.037$ ; $p=0.030$ |           |                | VAf-2=      | 14.82%          |           |                |             |                 |           |                |

|             | <b>Model 0_N-acetylalanine</b> |           |                |             | <b>Model 1_N-acetylalanine</b> |           |                |             | <b>Model 2_N-acetylalanine</b> |           |                |
|-------------|--------------------------------|-----------|----------------|-------------|--------------------------------|-----------|----------------|-------------|--------------------------------|-----------|----------------|
|             | <b>estimate</b>                | <b>SE</b> | <b>p-value</b> |             | <b>estimate</b>                | <b>SE</b> | <b>p-value</b> |             | <b>estimate</b>                | <b>SE</b> | <b>p-value</b> |
| acid intake | 0.32                           | 0.15      | 0.03           | acid intake | 0.17                           | 0.05      | 2.03E-03       | acid intake | 0.18                           | 0.16      | 0.25           |
|             |                                |           |                |             |                                |           |                | metabolite  | 1.09                           | 0.11      | 4.48E-25       |
| ACME-1=     | $\beta=0.032$ ; $p=0.002$      |           |                | VAf-1=      | 36.65%                         |           |                |             |                                |           |                |

|             | <b>Model 3_N-acetylalanine</b> |           |                |             | <b>Model 4_N-acetylalanine</b> |           |                |             | <b>Model 5_N-acetylalanine</b> |           |                |
|-------------|--------------------------------|-----------|----------------|-------------|--------------------------------|-----------|----------------|-------------|--------------------------------|-----------|----------------|
|             | <b>estimate</b>                | <b>SE</b> | <b>p-value</b> |             | <b>estimate</b>                | <b>SE</b> | <b>p-value</b> |             | <b>estimate</b>                | <b>SE</b> | <b>p-value</b> |
| acid intake | 0.17                           | 0.05      | 2.03E-03       | acid intake | 0.06                           | 0.03      | 0.03           | acid intake | 0.12                           | 0.05      | 0.01           |
|             |                                |           |                |             |                                |           |                | CKD         | 0.66                           | 0.06      | 1.89E-30       |
| ACME-2=     | $\beta=0.042$ ; $p=0.030$      |           |                | VAf-2=      | 18.88%                         |           |                |             |                                |           |                |

|             | <b>Model 0_tiglylcarnitine (C5:1-DC)</b> |           |                |             | <b>Model 1_tiglylcarnitine (C5:1-DC)</b> |           |                |             | <b>Model 2_tiglylcarnitine (C5:1-DC)</b> |           |                |
|-------------|------------------------------------------|-----------|----------------|-------------|------------------------------------------|-----------|----------------|-------------|------------------------------------------|-----------|----------------|
|             | <b>estimate</b>                          | <b>SE</b> | <b>p-value</b> |             | <b>estimate</b>                          | <b>SE</b> | <b>p-value</b> |             | <b>estimate</b>                          | <b>SE</b> | <b>p-value</b> |
| acid intake | 0.32                                     | 0.15      | 0.03           | acid intake | 0.21                                     | 0.06      | 6.89E-04       | acid intake | 0.26                                     | 0.15      | 0.08           |
|             |                                          |           |                |             |                                          |           |                | metabolite  | 0.35                                     | 0.08      | 3.97E-06       |
| ACME-1=     | $\beta=0.015$ ; $p=0.002$                |           |                | VAf-1=      | 18.69%                                   |           |                |             |                                          |           |                |

**Model 3\_tiglylcarnitine (C5:1-DC)**  
**estimate SE p-value**

**Model 4\_tiglylcarnitine (C5:1-DC)**  
**estimate SE p-value**

**Model 5\_tiglylcarnitine (C5:1-DC)**  
**estimate SE p-value**

|                                   |      |      |          |             |      |      |      |             |      |      |          |
|-----------------------------------|------|------|----------|-------------|------|------|------|-------------|------|------|----------|
| acid intake                       | 0.21 | 0.06 | 6.89E-04 | acid intake | 0.06 | 0.03 | 0.03 | acid intake | 0.19 | 0.06 | 1.97E-03 |
|                                   |      |      |          |             |      |      |      | CKD         | 0.32 | 0.07 | 3.80E-06 |
| ACME-2= $\beta=0.020$ ; $p=0.030$ |      |      |          | VAF-2=8.38% |      |      |      |             |      |      |          |



**Table S3: results of regression models used for mediation analyses with urine metabolites. Related to figure 2**

**Model 0=CKD~ acid intake+age+sex+bmi**

**Model 1=metabolite~ acid intake + age+ sex+ bmi**

**Model 2 CKD~ acid intake+metabolite+age+sex+bmi**

**Model 3 metabolite~ acid intake+age+sex+bmi**

**Model 4 CKD~ acid intake + age+ sex+ bmi**

**Model 5 metabolite~ acid intake+CKD+age+sex+bmi**

**VAF-1= Variance Accounted For using metabolite as mediator; VAF-2= Variance Accounted For using CKD as mediator;**

**ACME-1=Average Causal Mediation Effects using metabolite as mediator; AMCE-2= Average Causal Mediation Effects using CKD as mediator**

| <b>Model 0_3–hydroxyphenylacetate</b>  |                                    |           |                | <b>Model 1_3–hydroxyphenylacetate</b>  |                 |           |                | <b>Model 2_3–hydroxyphenylacetate</b>  |                 |           |                |
|----------------------------------------|------------------------------------|-----------|----------------|----------------------------------------|-----------------|-----------|----------------|----------------------------------------|-----------------|-----------|----------------|
|                                        | <b>estimate</b>                    | <b>SE</b> | <b>p-value</b> |                                        | <b>estimate</b> | <b>SE</b> | <b>p-value</b> |                                        | <b>estimate</b> | <b>SE</b> | <b>p-value</b> |
| acid intake                            | 0.32                               | 0.15      | 0.03           | acid intake                            | 0.05            | 0.06      | 0.39           | acid intake                            | 0.33            | 0.15      | 0.02           |
|                                        |                                    |           |                |                                        |                 |           |                | metabolite                             | -0.06           | 0.07      | 0.38           |
| ACME-1=                                | $\beta = -0.0007$ ;<br>$p = 0.616$ |           |                | VAF-1=NA; no significant mediation     |                 |           |                |                                        |                 |           |                |
| <b>Model 3_3–hydroxyphenylacetate</b>  |                                    |           |                | <b>Model 4_3–hydroxyphenylacetate</b>  |                 |           |                | <b>Model 5_3–hydroxyphenylacetate</b>  |                 |           |                |
|                                        | <b>estimate</b>                    | <b>SE</b> | <b>p-value</b> |                                        | <b>estimate</b> | <b>SE</b> | <b>p-value</b> |                                        | <b>estimate</b> | <b>SE</b> | <b>p-value</b> |
| acid intake                            | 0.05                               | 0.06      | 0.39           | acid intake                            | 0.06            | 0.03      | 0.03           | acid intake                            | 0.06            | 0.03      | 0.03           |
|                                        |                                    |           |                |                                        |                 |           |                | CKD                                    | -0.06           | 0.07      | 0.42           |
| ACME-2=                                | $\beta = -0.004$ ; $p = 0.40$      |           |                | VAF-2=NA; no significant mediation     |                 |           |                |                                        |                 |           |                |
| <b>Model 0_3–methylcrotonylglycine</b> |                                    |           |                | <b>Model 1_3–methylcrotonylglycine</b> |                 |           |                | <b>Model 2_3–methylcrotonylglycine</b> |                 |           |                |
|                                        | <b>estimate</b>                    | <b>SE</b> | <b>p-value</b> |                                        | <b>estimate</b> | <b>SE</b> | <b>p-value</b> |                                        | <b>estimate</b> | <b>SE</b> | <b>p-value</b> |
| acid intake                            | 0.32                               | 0.15      | 0.03           | acid intake                            | -0.01           | 0.06      | 0.90           | acid intake                            | 0.32            | 0.15      | 0.03           |
|                                        |                                    |           |                |                                        |                 |           |                | metabolite                             | 0.12            | 0.07      | 0.10           |
| ACME-1=                                | $\beta = -0.0002$ ; $p = 0.90$     |           |                | VAF-1=NA; no significant mediation     |                 |           |                |                                        |                 |           |                |

| <b>Model 3_3–methylcrotonylglycine</b> |                          |           |                | <b>Model 4_3–methylcrotonylglycine</b> |                 |           |                | <b>Model 5_3–methylcrotonylglycine</b> |                 |           |                |
|----------------------------------------|--------------------------|-----------|----------------|----------------------------------------|-----------------|-----------|----------------|----------------------------------------|-----------------|-----------|----------------|
|                                        | <b>estimate</b>          | <b>SE</b> | <b>p-value</b> |                                        | <b>estimate</b> | <b>SE</b> | <b>p-value</b> |                                        | <b>estimate</b> | <b>SE</b> | <b>p-value</b> |
| acid intake                            | -0.01                    | 0.06      | 0.90           | acid intake                            | 0.06            | 0.03      | 0.03           | acid intake                            | -0.01           | 0.06      | 0.90           |
| CKD                                    |                          |           |                |                                        |                 |           |                | CKD                                    | 0.12            | 0.07      | 0.09           |
| ACME-2=                                | $\beta=0.008$ ; $p=0.13$ |           |                | VAF-2=NA; no significant mediation     |                 |           |                |                                        |                 |           |                |

| <b>Model 0_3–methylglutaryl carnitine (2)</b> |                          |           |                | <b>Model 1_3–methylglutaryl carnitine (2)</b> |                 |           |                | <b>Model 2_3–methylglutaryl carnitine (2)</b> |                 |           |                |
|-----------------------------------------------|--------------------------|-----------|----------------|-----------------------------------------------|-----------------|-----------|----------------|-----------------------------------------------|-----------------|-----------|----------------|
|                                               | <b>estimate</b>          | <b>SE</b> | <b>p-value</b> |                                               | <b>estimate</b> | <b>SE</b> | <b>p-value</b> |                                               | <b>estimate</b> | <b>SE</b> | <b>p-value</b> |
| acid intake                                   | 0.32                     | 0.15      | 0.03           | acid intake                                   | 0.12            | 0.06      | 0.05           | acid intake                                   | 0.31            | 0.15      | 0.04           |
| metabolite                                    |                          |           |                |                                               |                 |           |                | metabolite                                    | 0.13            | 0.08      | 0.09           |
| ACME-1=                                       | $\beta=0.003$ ; $p=0.11$ |           |                | VAF-1=NA; no significant mediation            |                 |           |                |                                               |                 |           |                |

| <b>Model 3_3–methylglutaryl carnitine (2)</b> |                           |           |                | <b>Model 4_3–methylglutaryl carnitine (2)</b> |                 |           |                | <b>Model 5_3–methylglutaryl carnitine (2)</b> |                 |           |                |
|-----------------------------------------------|---------------------------|-----------|----------------|-----------------------------------------------|-----------------|-----------|----------------|-----------------------------------------------|-----------------|-----------|----------------|
|                                               | <b>estimate</b>           | <b>SE</b> | <b>p-value</b> |                                               | <b>estimate</b> | <b>SE</b> | <b>p-value</b> |                                               | <b>estimate</b> | <b>SE</b> | <b>p-value</b> |
| acid intake                                   | 0.12                      | 0.06      | 0.05           | acid intake                                   | 0.06            | 0.03      | 0.03           | acid intake                                   | 0.11            | 0.06      | 0.07           |
| CKD                                           |                           |           |                |                                               |                 |           |                | CKD                                           | 0.11            | 0.07      | 0.09           |
| ACME-2=                                       | $\beta=0.007$ ; $p=0.098$ |           |                | VAF-2=NA; no significant mediation            |                 |           |                |                                               |                 |           |                |

| <b>Model 0_3–methylhistidine</b> |                           |           |                | <b>Model 1_3–methylhistidine</b> |                 |           |                | <b>Model 2_3–methylhistidine</b> |                 |           |                |
|----------------------------------|---------------------------|-----------|----------------|----------------------------------|-----------------|-----------|----------------|----------------------------------|-----------------|-----------|----------------|
|                                  | <b>estimate</b>           | <b>SE</b> | <b>p-value</b> |                                  | <b>estimate</b> | <b>SE</b> | <b>p-value</b> |                                  | <b>estimate</b> | <b>SE</b> | <b>p-value</b> |
| acid intake                      | 0.32                      | 0.15      | 0.03           | acid intake                      | 0.25            | 0.06      | 0.00           | acid intake                      | 0.28            | 0.15      | 0.05           |
| metabolite                       |                           |           |                |                                  |                 |           |                | metabolite                       | 0.16            | 0.08      | 0.03           |
| ACME-1=                          | $\beta=0.008$ ; $p=0.040$ |           |                | VAF-1=11.11%                     |                 |           |                |                                  |                 |           |                |

| <b>Model 3_3–methylhistidine</b> |                            |           |                | <b>Model 4_3–methylhistidine</b>   |                 |           |                | <b>Model 5_3–methylhistidine</b> |                 |           |                |
|----------------------------------|----------------------------|-----------|----------------|------------------------------------|-----------------|-----------|----------------|----------------------------------|-----------------|-----------|----------------|
|                                  | <b>estimate</b>            | <b>SE</b> | <b>p-value</b> |                                    | <b>estimate</b> | <b>SE</b> | <b>p-value</b> |                                  | <b>estimate</b> | <b>SE</b> | <b>p-value</b> |
| acid intake                      | 0.25                       | 0.06      | 0.00           | acid intake                        | 0.06            | 0.03      | 0.03           | acid intake                      | 0.24            | 0.06      | 0.00           |
| CKD                              |                            |           |                |                                    |                 |           |                | CKD                              | 0.15            | 0.07      | 0.03           |
| ACME-2=                          | $\beta=0.0096$ ; $p=0.072$ |           |                | VAF-2=NA; no significant mediation |                 |           |                |                                  |                 |           |                |

| <b>Model 0_4-ethylphenol glucuronide</b> |                             |           |                | <b>Model 1_4-ethylphenol glucuronide</b> |                 |           |                | <b>Model 2_4-ethylphenol glucuronide</b>  |                 |           |                |
|------------------------------------------|-----------------------------|-----------|----------------|------------------------------------------|-----------------|-----------|----------------|-------------------------------------------|-----------------|-----------|----------------|
|                                          | <b>estimate</b>             | <b>SE</b> | <b>p-value</b> |                                          | <b>estimate</b> | <b>SE</b> | <b>p-value</b> |                                           | <b>estimate</b> | <b>SE</b> | <b>p-value</b> |
| acid intake                              | 0.32                        | 0.15      | 0.03           | acid intake                              | 0.05            | 0.06      | 0.42           | acid intake                               | 0.32            | 0.15      | 0.03           |
| metabolite                               |                             |           |                |                                          |                 |           |                | metabolite                                | -0.02           | 0.08      | 0.76           |
| ACME-1=                                  | $\beta = -0.0002; p=0.846$  |           |                | VAF-1=NA; no significant mediation       |                 |           |                |                                           |                 |           |                |
| <b>Model 3_4-ethylphenol glucuronide</b> |                             |           |                | <b>Model 4_4-ethylphenol glucuronide</b> |                 |           |                | <b>Model 5_34-ethylphenol glucuronide</b> |                 |           |                |
|                                          | <b>estimate</b>             | <b>SE</b> | <b>p-value</b> |                                          | <b>estimate</b> | <b>SE</b> | <b>p-value</b> |                                           | <b>estimate</b> | <b>SE</b> | <b>p-value</b> |
| acid intake                              | 0.05                        | 0.06      | 0.42           | acid intake                              | 0.06            | 0.03      | 0.03           | acid intake                               | 0.05            | 0.06      | 0.41           |
|                                          |                             |           |                |                                          |                 |           |                | CKD                                       | -0.02           | 0.07      | 0.72           |
| ACME-2=                                  | $\beta = -0.00153; p=0.73$  |           |                | VAF-2=NA; no significant mediation       |                 |           |                |                                           |                 |           |                |
| <b>Model 0_alpha-ketoglutarate</b>       |                             |           |                | <b>Model 1_alpha-ketoglutarate</b>       |                 |           |                | <b>Model 2_alpha-ketoglutarate</b>        |                 |           |                |
|                                          | <b>estimate</b>             | <b>SE</b> | <b>p-value</b> |                                          | <b>estimate</b> | <b>SE</b> | <b>p-value</b> |                                           | <b>estimate</b> | <b>SE</b> | <b>p-value</b> |
| acid intake                              | 0.32                        | 0.15      | 0.03           | acid intake                              | 0.19            | 0.06      | 0.00           | acid intake                               | 0.29            | 0.15      | 0.05           |
|                                          |                             |           |                |                                          |                 |           |                | metabolite                                | 0.21            | 0.07      | 0.01           |
| ACME-1=                                  | $\beta = 0.00772; p=0.006$  |           |                | VAF-1=11.09%                             |                 |           |                |                                           |                 |           |                |
| <b>Model 3_alpha-ketoglutarate</b>       |                             |           |                | <b>Model 4_alpha-ketoglutarate</b>       |                 |           |                | <b>Model 5_alpha-ketoglutarate</b>        |                 |           |                |
|                                          | <b>estimate</b>             | <b>SE</b> | <b>p-value</b> |                                          | <b>estimate</b> | <b>SE</b> | <b>p-value</b> |                                           | <b>estimate</b> | <b>SE</b> | <b>p-value</b> |
| acid intake                              | 0.19                        | 0.06      | 0.00           | acid intake                              | 0.06            | 0.03      | 0.03           | acid intake                               | 0.18            | 0.06      | 0.01           |
|                                          |                             |           |                |                                          |                 |           |                | CKD                                       | 0.20            | 0.07      | 0.00           |
| ACME-2=                                  | $\beta = 0.012712; p=0.036$ |           |                | VAF-2=5.94%                              |                 |           |                |                                           |                 |           |                |
| <b>Model 0_cortisol 21-sulfate</b>       |                             |           |                | <b>Model 1_cortisol 21-sulfate</b>       |                 |           |                | <b>Model 2_cortisol 21-sulfate</b>        |                 |           |                |
|                                          | <b>estimate</b>             | <b>SE</b> | <b>p-value</b> |                                          | <b>estimate</b> | <b>SE</b> | <b>p-value</b> |                                           | <b>estimate</b> | <b>SE</b> | <b>p-value</b> |
| acid intake                              | 0.32                        | 0.15      | 0.03           | acid intake                              | 0.12            | 0.06      | 0.05           | acid intake                               | 0.33            | 0.15      | 0.02           |
|                                          |                             |           |                |                                          |                 |           |                | metabolite                                | -0.09           | 0.08      | 0.27           |
| ACME-1=                                  | $\beta = -0.002; p=0.342$   |           |                | VAF-1=NA; no significant mediation       |                 |           |                |                                           |                 |           |                |

| <b>Model 3_cortisol 21-sulfate</b> |                            |           |                | <b>Model 4_cortisol 21-sulfate</b> |                 |           |                | <b>Model 5_cortisol 21-sulfate</b> |                 |           |                |
|------------------------------------|----------------------------|-----------|----------------|------------------------------------|-----------------|-----------|----------------|------------------------------------|-----------------|-----------|----------------|
|                                    | <b>estimate</b>            | <b>SE</b> | <b>p-value</b> |                                    | <b>estimate</b> | <b>SE</b> | <b>p-value</b> |                                    | <b>estimate</b> | <b>SE</b> | <b>p-value</b> |
| acid intake                        | 0.12                       | 0.06      | 0.05           | acid intake                        | 0.06            | 0.03      | 0.03           | acid intake                        | 0.12            | 0.06      | 0.04           |
|                                    |                            |           |                |                                    |                 |           |                | CKD                                | -0.07           | 0.07      | 0.29           |
| ACME-2=                            | $\beta=-0.004$ ; $p=0.376$ |           |                | VAF-2=NA; no significant mediation |                 |           |                |                                    |                 |           |                |

**Table S4: results of regression models used for mediation analyses with stool metabolites. Related to figure 2**

**Model 0=CKD~ acid intake+age+sex+bmi**

**Model 1=metabolite~ acid intake + age+ sex+ bmi**

**Model 2 CKD~ acid intake+metabolite+age+sex+bmi**

**Model 3 metabolite~ acid intake+age+sex+bmi**

**Model 4 CKD~ acid intake + age+ sex+ bmi**

**Model 5 metabolite~ acid intake+CKD+age+sex+bmi**

**VAF-1= Variance Accounted For using metabolite as mediator; VAF-2= Variance Accounted For using CKD as mediator;**

**ACME-1=Average Causal Mediation Effects using metabolite as mediator; AMCE-2= Average Causal Mediation Effects using CKD as mediator**

| <b>Model 0_4–hydroxyphenylpyruvate</b>  |                                 |           |                | <b>Model 1_4–hydroxyphenylpyruvate</b>  |                 |           |                | <b>Model 2_4–hydroxyphenylpyruvate</b>  |                 |           |                |
|-----------------------------------------|---------------------------------|-----------|----------------|-----------------------------------------|-----------------|-----------|----------------|-----------------------------------------|-----------------|-----------|----------------|
|                                         | <b>estimate</b>                 | <b>SE</b> | <b>p-value</b> |                                         | <b>estimate</b> | <b>SE</b> | <b>p-value</b> |                                         | <b>estimate</b> | <b>SE</b> | <b>p-value</b> |
| acid intake                             | 0.31                            | 0.14      | 0.03           | acid intake                             | 0.00            | 0.06      | 0.95           | acid intake                             | 0.31            | 0.14      | 0.03           |
|                                         |                                 |           |                |                                         |                 |           |                | metabolite                              | 0.08            | 0.07      | 0.28           |
| ACME-1=                                 | $\beta = -6.15e-05$ ; $p=0.904$ |           |                | VAF-1=NA; no significant mediation      |                 |           |                |                                         |                 |           |                |
| <b>Model 3_4–hydroxyphenylpyruvate</b>  |                                 |           |                | <b>Model 4_4–hydroxyphenylpyruvate</b>  |                 |           |                | <b>Model 5_4–hydroxyphenylpyruvate</b>  |                 |           |                |
|                                         | <b>estimate</b>                 | <b>SE</b> | <b>p-value</b> |                                         | <b>estimate</b> | <b>SE</b> | <b>p-value</b> |                                         | <b>estimate</b> | <b>SE</b> | <b>p-value</b> |
| acid intake                             | 0.00                            | 0.06      | 0.95           | acid intake                             | 0.06            | 0.03      | 0.04           | acid intake                             | -0.01           | 0.06      | 0.89           |
|                                         |                                 |           |                |                                         |                 |           |                | CKD                                     | 0.08            | 0.07      | 0.24           |
| ACME-2=                                 | $\beta = 0.00498$ ; $p=0.28$    |           |                | VAF-2=NA; no significant mediation      |                 |           |                |                                         |                 |           |                |
| <b>Model 0_5–methylhexanoate (i7:0)</b> |                                 |           |                | <b>Model 1_5–methylhexanoate (i7:0)</b> |                 |           |                | <b>Model 2_5–methylhexanoate (i7:0)</b> |                 |           |                |
|                                         | <b>estimate</b>                 | <b>SE</b> | <b>p-value</b> |                                         | <b>estimate</b> | <b>SE</b> | <b>p-value</b> |                                         | <b>estimate</b> | <b>SE</b> | <b>p-value</b> |
| acid intake                             | 0.31                            | 0.14      | 0.03           | acid intake                             | 0.25            | 0.06      | 0.00           | acid intake                             | 0.26            | 0.15      | 0.07           |
|                                         |                                 |           |                |                                         |                 |           |                | metabolite                              | 0.19            | 0.08      | 0.01           |
| ACME-1=                                 | $\beta = 0.0097$ ; $p=0.014$    |           |                | VAF-1=13.29%                            |                 |           |                |                                         |                 |           |                |

| <b>Model 3_5–methylhexanoate (i7:0)</b> |                               |           |                | <b>Model 4_5–methylhexanoate (i7:0)</b> |                 |           |                | <b>Model 5_5–methylhexanoate (i7:0)</b> |                 |           |                |
|-----------------------------------------|-------------------------------|-----------|----------------|-----------------------------------------|-----------------|-----------|----------------|-----------------------------------------|-----------------|-----------|----------------|
|                                         | <b>estimate</b>               | <b>SE</b> | <b>p-value</b> |                                         | <b>estimate</b> | <b>SE</b> | <b>p-value</b> |                                         | <b>estimate</b> | <b>SE</b> | <b>p-value</b> |
| acid intake                             | 0.25                          | 0.06      | 4.51E-05       | acid intake                             | 0.06            | 0.03      | 0.04           | acid intake                             | 0.24            | 0.06      | 0.00           |
| CKD                                     |                               |           |                |                                         |                 |           |                | CKD                                     | 0.18            | 0.07      | 0.01           |
| ACME-2=                                 | $\beta=0.011$ ; $p=0.04$      |           |                | VAF-2=4.14%                             |                 |           |                |                                         |                 |           |                |
| <b>Model 0_pyridoxal</b>                |                               |           |                | <b>Model 1_pyridoxal</b>                |                 |           |                | <b>Model 2_pyridoxal</b>                |                 |           |                |
|                                         | <b>estimate</b>               | <b>SE</b> | <b>p-value</b> |                                         | <b>estimate</b> | <b>SE</b> | <b>p-value</b> |                                         | <b>estimate</b> | <b>SE</b> | <b>p-value</b> |
| acid intake                             | 0.31                          | 0.14      | 0.03           | acid intake                             | -0.15           | 0.06      | 0.02           | acid intake                             | 0.29            | 0.15      | 0.05           |
| metabolite                              |                               |           |                |                                         |                 |           |                | metabolite                              | -0.13           | 0.07      | 0.07           |
| ACME-1=                                 | $\beta= 4.01e-03$ ; $p=0.104$ |           |                | VAF-1=NA; no significant mediation      |                 |           |                |                                         |                 |           |                |
| <b>Model 3_pyridoxal</b>                |                               |           |                | <b>Model 4_pyridoxal</b>                |                 |           |                | <b>Model 5_pyridoxal</b>                |                 |           |                |
|                                         | <b>estimate</b>               | <b>SE</b> | <b>p-value</b> |                                         | <b>estimate</b> | <b>SE</b> | <b>p-value</b> |                                         | <b>estimate</b> | <b>SE</b> | <b>p-value</b> |
| acid intake                             | -0.15                         | 0.06      | 0.02           | acid intake                             | 0.06            | 0.03      | 0.04           | acid intake                             | -0.14           | 0.06      | 0.02           |
| CKD                                     |                               |           |                |                                         |                 |           |                | CKD                                     | -0.12           | 0.07      | 0.07           |
| ACME-2=                                 | $\beta=-0.0077$ ; $p=0.124$   |           |                | VAF-2=NA; no significant mediation      |                 |           |                |                                         |                 |           |                |

**SupTable S5: results of regression models used for mediation analyses with saliva metabolites. Related to figure 2**

**Model 0=CKD~ acid intake+age+sex+bmi**

**Model 1=metabolite~ acid intake + age+ sex+ bmi**

**Model 2 CKD~ acid intake+metabolite+age+sex+bmi**

**Model 3 metabolite~ acid intake+age+sex+bmi**

**Model 4 CKD~ acid intake + age+ sex+ bmi**

**Model 5 metabolite~ acid intake+CKD+age+sex+bmi**

**VAF-1= Variance Accounted For using metabolite as mediator; VAF-2= Variance Accounted For using CKD as mediator;**

**ACME-1=Average Causal Mediation Effects using metabolite as mediator; AMCE-2= Average Causal Mediation Effects using CKD as mediator**

| <b>Model 0_1-stearoyl-GPI (18:0)</b> |                                 |           |                | <b>Model 1_1-stearoyl-GPI (18:0)</b> |                 |           |                | <b>Model 2_1-stearoyl-GPI (18:0)</b> |                 |           |                |
|--------------------------------------|---------------------------------|-----------|----------------|--------------------------------------|-----------------|-----------|----------------|--------------------------------------|-----------------|-----------|----------------|
|                                      | <b>estimate</b>                 | <b>SE</b> | <b>p-value</b> |                                      | <b>estimate</b> | <b>SE</b> | <b>p-value</b> |                                      | <b>estimate</b> | <b>SE</b> | <b>p-value</b> |
| acid intake                          | 0.34                            | 0.14      | 0.02           | acid intake                          | 0.03            | 0.07      | 0.63           | acid intake                          | 0.34            | 0.14      | 0.02           |
|                                      |                                 |           |                |                                      |                 |           |                | metabolite                           | -0.06           | 0.07      | 0.36           |
| ACME-1=                              | $\beta = -0.000415$ ; $p=0.770$ |           |                | VAF-1=NA; no significant mediation   |                 |           |                |                                      |                 |           |                |
| <b>Model 3_1-stearoyl-GPI (18:0)</b> |                                 |           |                | <b>Model 4_1-stearoyl-GPI (18:0)</b> |                 |           |                | <b>Model 5_1-stearoyl-GPI (18:0)</b> |                 |           |                |
|                                      | <b>estimate</b>                 | <b>SE</b> | <b>p-value</b> |                                      | <b>estimate</b> | <b>SE</b> | <b>p-value</b> |                                      | <b>estimate</b> | <b>SE</b> | <b>p-value</b> |
| acid intake                          | 0.03                            | 0.07      | 0.63           | acid intake                          | 0.07            | 0.03      | 0.02           | acid intake                          | 0.04            | 0.07      | 0.58           |
|                                      |                                 |           |                |                                      |                 |           |                | CKD                                  | -0.07           | 0.07      | 0.36           |
| ACME-2=                              | $\beta = -0.005$ ; $p=0.35$     |           |                | VAF-2=NA; no significant mediation   |                 |           |                |                                      |                 |           |                |
| <b>Model 0_allantoin</b>             |                                 |           |                | <b>Model 1_allantoin</b>             |                 |           |                | <b>Model 2_allantoin</b>             |                 |           |                |
|                                      | <b>estimate</b>                 | <b>SE</b> | <b>p-value</b> |                                      | <b>estimate</b> | <b>SE</b> | <b>p-value</b> |                                      | <b>estimate</b> | <b>SE</b> | <b>p-value</b> |
| acid intake                          | 0.34                            | 0.14      | 0.02           | acid intake                          | 0.06            | 0.07      | 0.35           | acid intake                          | 0.33            | 0.14      | 0.02           |
|                                      |                                 |           |                |                                      |                 |           |                | metabolite                           | 0.12            | 0.07      | 0.10           |
| ACME-1=                              | $\beta = 0.00147$ ; $p=0.422$   |           |                | VAF-1=NA; no significant mediation   |                 |           |                |                                      |                 |           |                |

|                                                                                           | <b>Model 3_allantoin</b>       |           |                |                                                                                           | <b>Model 4_allantoin</b> |           |                |                                                                                           | <b>Model 5_allantoin</b> |           |                |
|-------------------------------------------------------------------------------------------|--------------------------------|-----------|----------------|-------------------------------------------------------------------------------------------|--------------------------|-----------|----------------|-------------------------------------------------------------------------------------------|--------------------------|-----------|----------------|
|                                                                                           | <b>estimate</b>                | <b>SE</b> | <b>p-value</b> |                                                                                           | <b>estimate</b>          | <b>SE</b> | <b>p-value</b> |                                                                                           | <b>estimate</b>          | <b>SE</b> | <b>p-value</b> |
| acid intake                                                                               | 0.06                           | 0.07      | 0.35           | acid intake                                                                               | 0.07                     | 0.03      | 0.02           | acid intake                                                                               | 0.05                     | 0.07      | 0.41           |
|                                                                                           |                                |           |                |                                                                                           |                          |           |                | CKD                                                                                       | 0.12                     | 0.07      | 0.11           |
| ACME-2=                                                                                   | $\beta=0.00796$ ; $p=0.12$     |           |                | VAF-2=NA; no significant mediation                                                        |                          |           |                |                                                                                           |                          |           |                |
| <b>Model 4_fructose 1,6-diphosphate/glucose 1,6-diphosphate/myo-inositol diphosphates</b> |                                |           |                | <b>Model 4_fructose 1,6-diphosphate/glucose 1,6-diphosphate/myo-inositol diphosphates</b> |                          |           |                | <b>Model 4_fructose 1,6-diphosphate/glucose 1,6-diphosphate/myo-inositol diphosphates</b> |                          |           |                |
|                                                                                           | <b>estimate</b>                | <b>SE</b> | <b>p-value</b> |                                                                                           | <b>estimate</b>          | <b>SE</b> | <b>p-value</b> |                                                                                           | <b>estimate</b>          | <b>SE</b> | <b>p-value</b> |
| acid intake                                                                               | 0.34                           | 0.14      | 0.02           | acid intake                                                                               | -0.05                    | 0.06      | 0.43           | acid intake                                                                               | 0.34                     | 0.14      | 0.02           |
|                                                                                           |                                |           |                |                                                                                           |                          |           |                | metabolite                                                                                | 0.05                     | 0.07      | 0.51           |
| ACME-1=                                                                                   | $\beta= -0.000496$ ; $p=0.722$ |           |                | VAF-1=NA; no significant mediation                                                        |                          |           |                |                                                                                           |                          |           |                |
| <b>Model 4_fructose 1,6-diphosphate/glucose 1,6-diphosphate/myo-inositol diphosphates</b> |                                |           |                | <b>Model 4_fructose 1,6-diphosphate/glucose 1,6-diphosphate/myo-inositol diphosphates</b> |                          |           |                | <b>Model 5_fructose 1,6-diphosphate/glucose 1,6-diphosphate/myo-inositol diphosphates</b> |                          |           |                |
|                                                                                           | <b>estimate</b>                | <b>SE</b> | <b>p-value</b> |                                                                                           | <b>estimate</b>          | <b>SE</b> | <b>p-value</b> |                                                                                           | <b>estimate</b>          | <b>SE</b> | <b>p-value</b> |
| acid intake                                                                               | -0.05                          | 0.06      | 0.43           | acid intake                                                                               | 0.07                     | 0.03      | 0.02           | acid intake                                                                               | -0.05                    | 0.06      | 0.40           |
|                                                                                           |                                |           |                |                                                                                           |                          |           |                | CKD                                                                                       | 0.05                     | 0.07      | 0.51           |
| ACME-2=                                                                                   | $\beta=0.00316$ ; $p=0.51$     |           |                | VAF-2=NA; no significant mediation                                                        |                          |           |                |                                                                                           |                          |           |                |



A

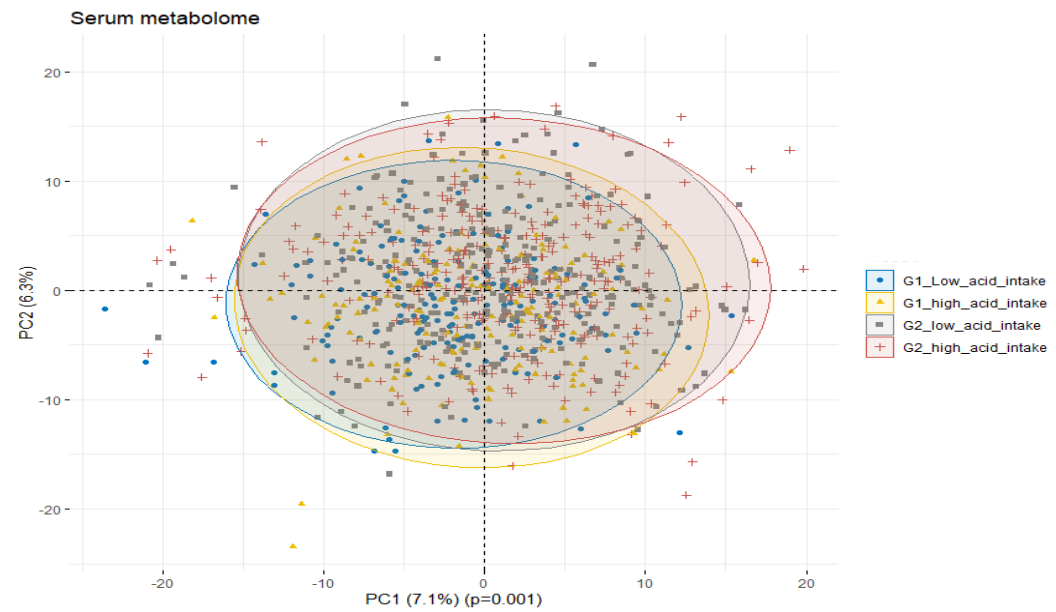

B

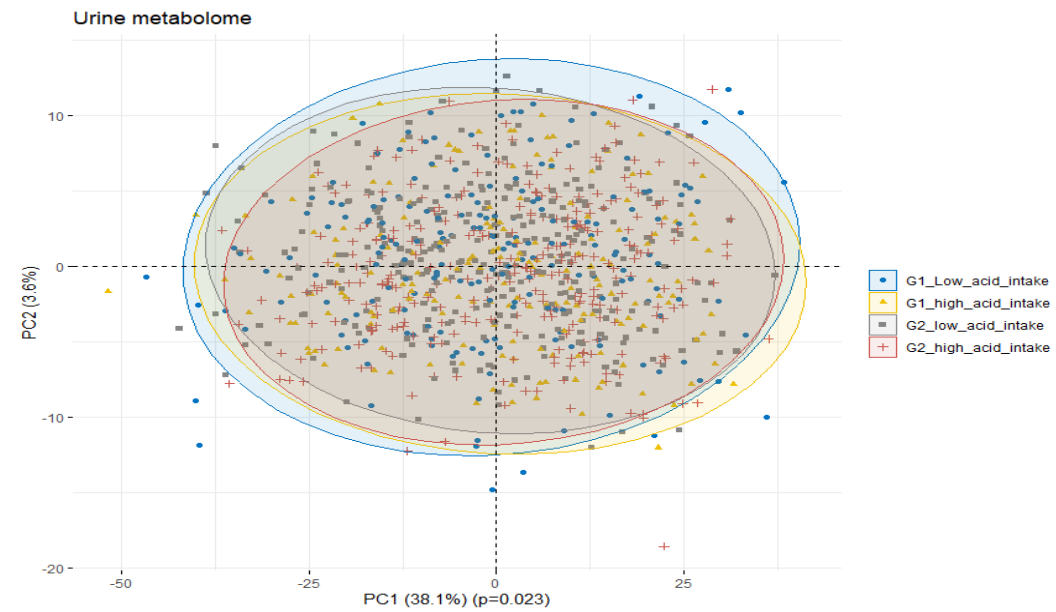

C

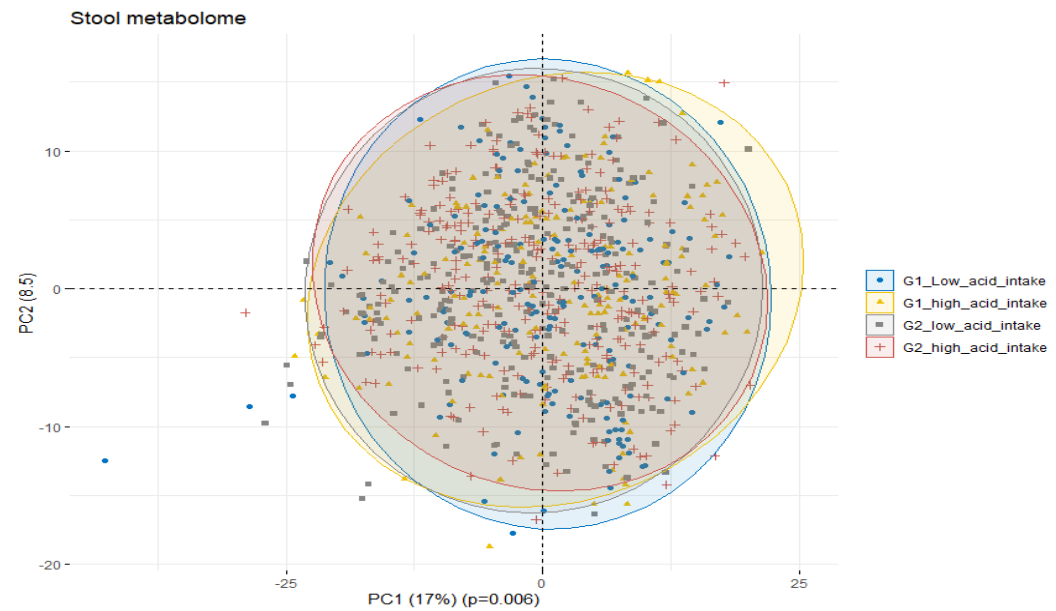

D

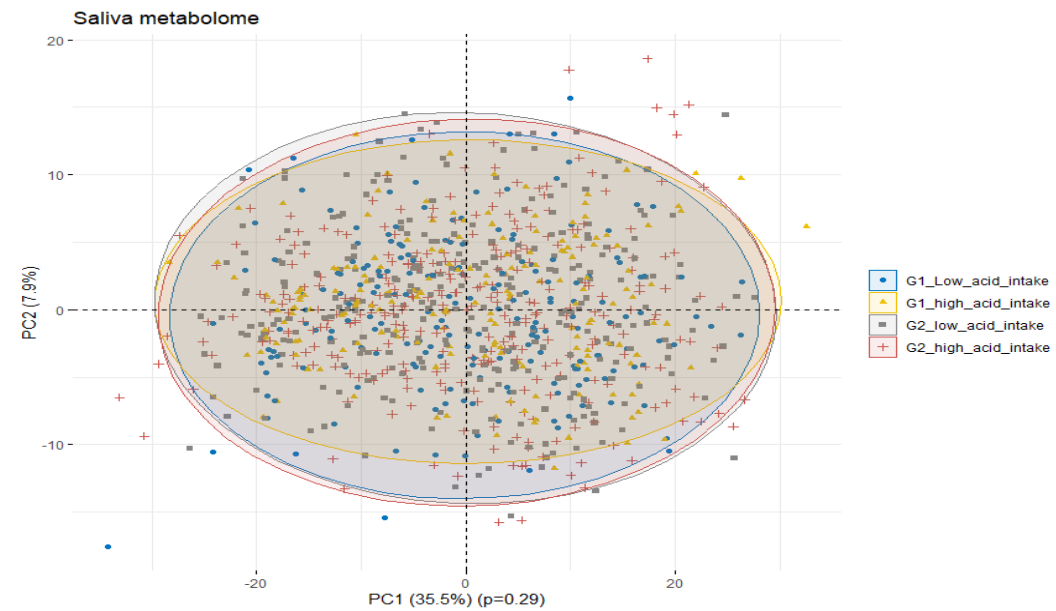

Figure S1. Results from PERMANOVA on (A) serum, (B), urine, (C) stool and (D) saliva metabolome. related to Figure 2.

**A**

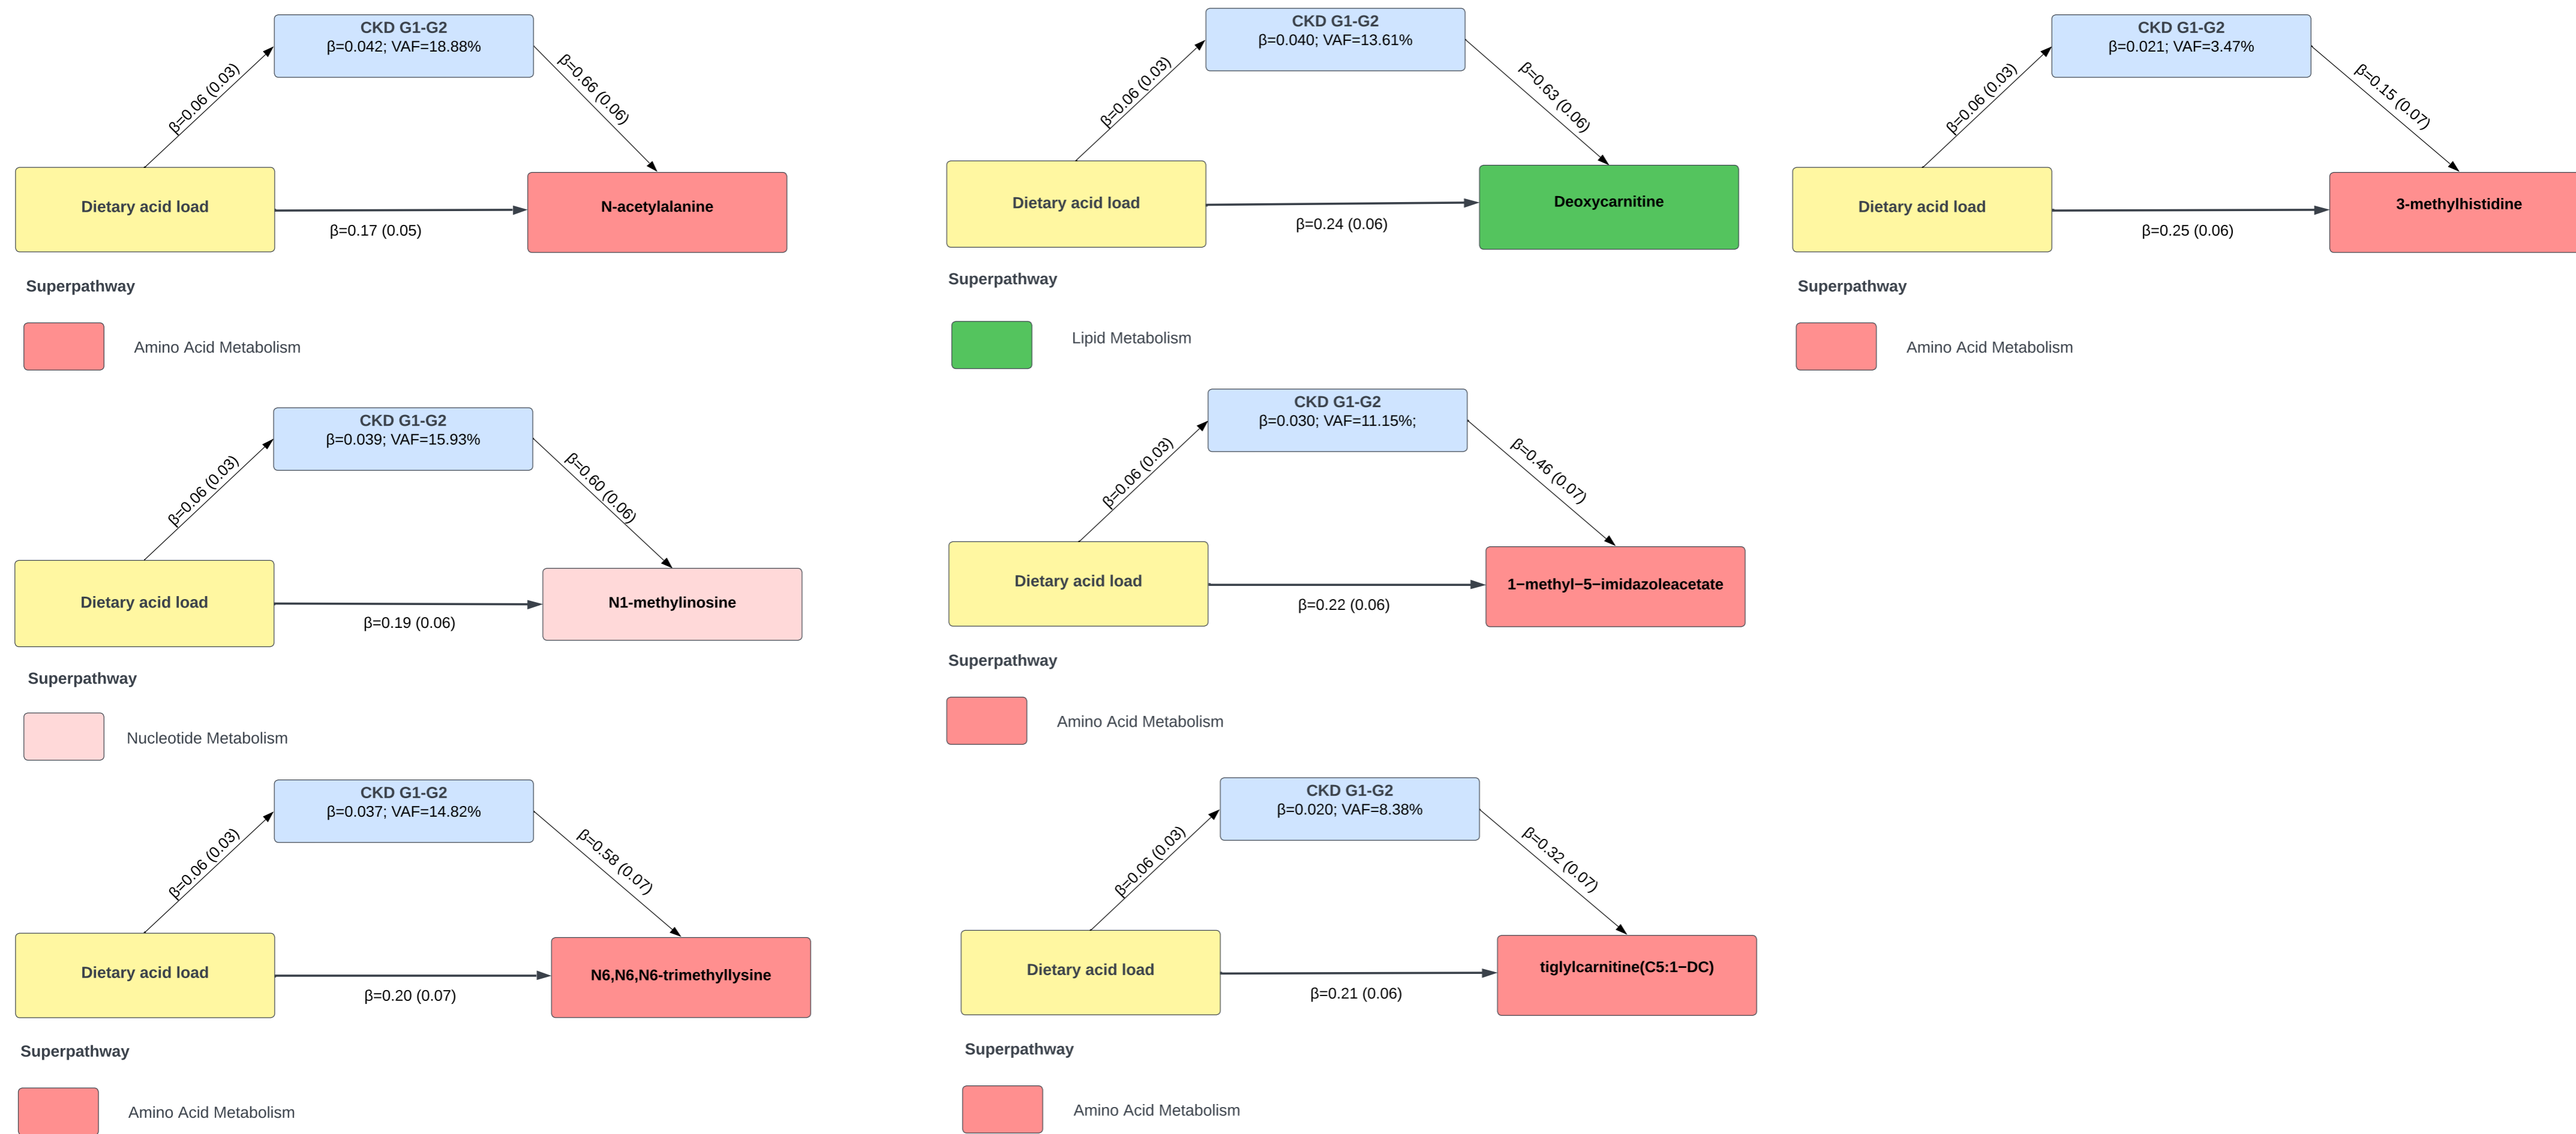

**B**

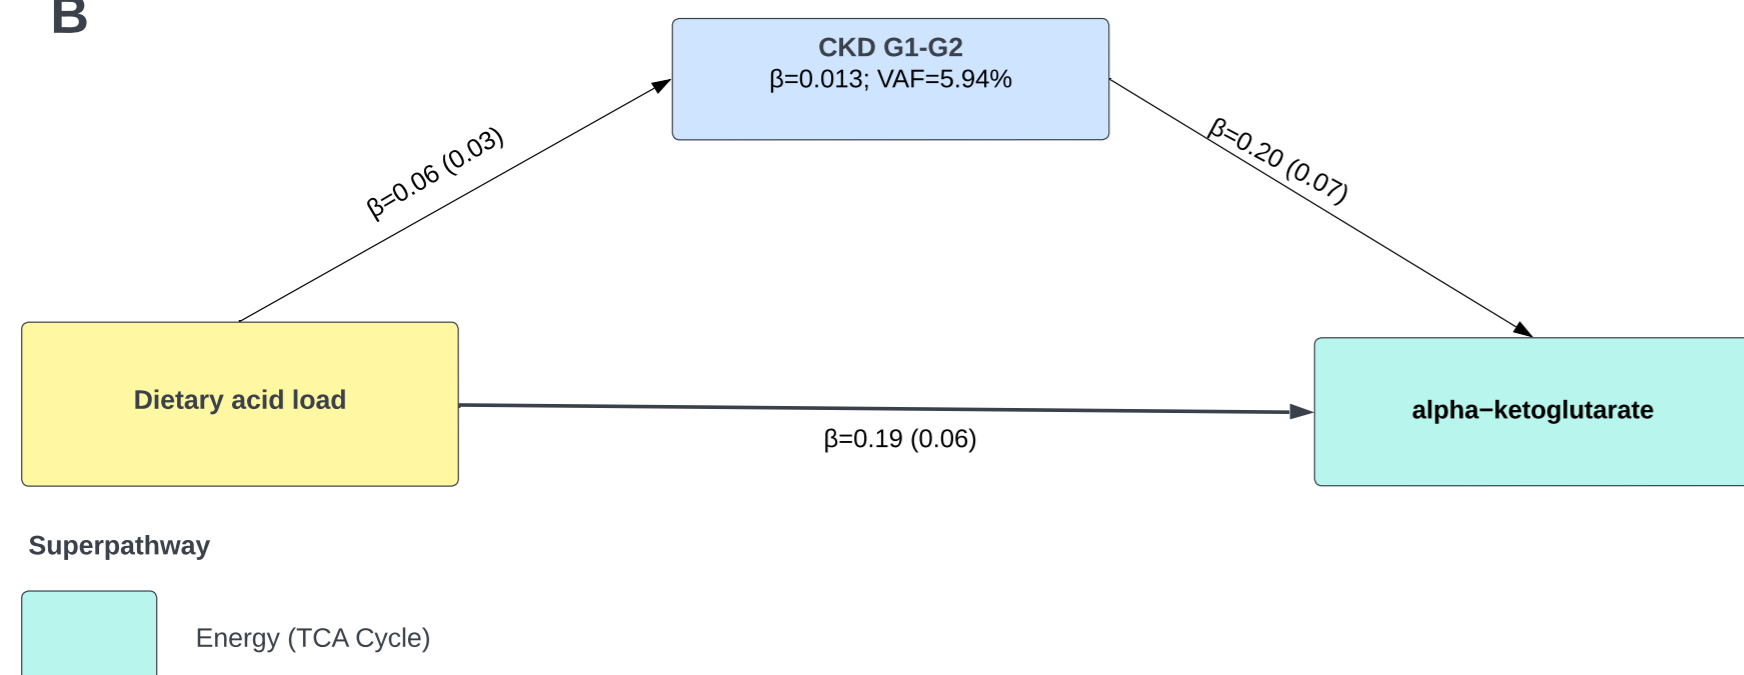

**C**

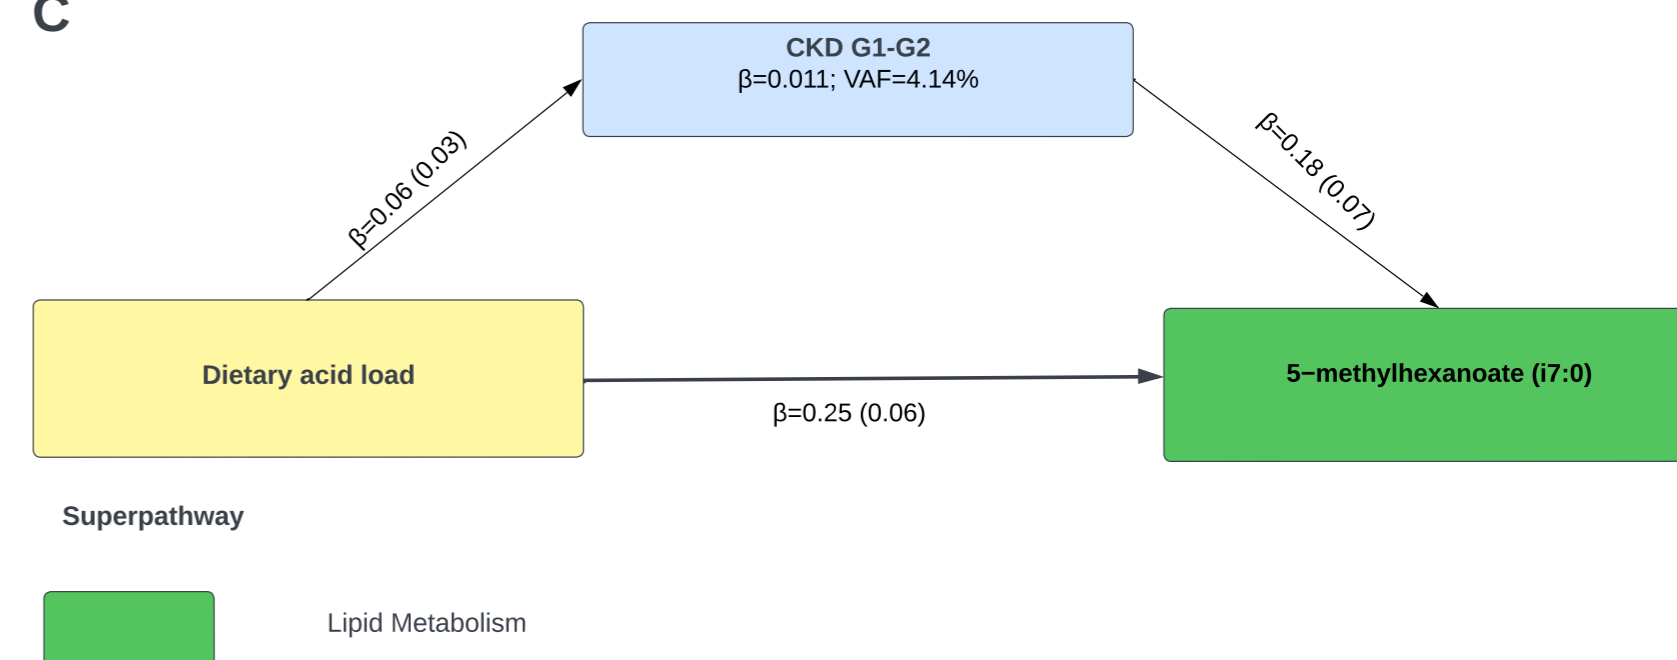

Figure S2. Mediation analysis of the association between DAL and metabolite of interest using CKD stage G1-G2 as potential mediator in (A) serum, (B) urine and (C) stool related to Figure 2.
